# Supplementary material for: Synergistic effects in ultrafine amorphous InSxOy nanowires boost photocatalytic syngas production from CO2
Source: Royal Society of Chemistry journal article supplement (doi:10.1039/d1ta10162e), 2022-01-01
Supplement: d1ta10162e1.pdf [file d1ta10162e1.pdf]

## **Synergistic Effects in Ultrafine Amorphous InS<sub>x</sub>O<sub>y</sub> Nanowires Boost Photocatalytic Syngas Production from CO<sub>2</sub>**

Zejun Zhao<sup>a,†</sup>, Zailun Liu<sup>b,c,†</sup>, Yong Yang<sup>a,\*</sup>, Teng Wang<sup>a</sup>, Fei Teng<sup>c</sup>, Wenjun Jiang<sup>b,\*</sup>, Junjun Li<sup>d</sup>, Zhicheng Zhang<sup>d,\*</sup>

<sup>a</sup> State Key Laboratory of Solidification Processing, Center of Advanced Lubrication and Seal Materials, Northwestern Polytechnical University, Xi'an, Shaanxi 710072, P. R. China

<sup>b</sup> Qian Xuesen Laboratory of Space Technology, China Academy of Space Technology, 104 Youyi Road, Beijing 100094, P. R. China

<sup>c</sup> School of Environmental Science and Engineering, Nanjing University of Information Science & Technology, Nanjing 210044, China

<sup>d</sup> Tianjin Key Laboratory of Molecular Optoelectronic Sciences, Department of Chemistry, School of Science, Tianjin University & Collaborative Innovation Center of Chemical Science and Engineering, Tianjin 300072, China

\*Corresponding author:

yongyangfj@nwpu.edu.cn; jiangwenjun@qxslab.cn; zczhang19@tju.edu.cn

---

## Experiment section

### 1. Chemicals

Indium(III) chloride tetrahydrate ( $\text{InCl}_3 \cdot 4\text{H}_2\text{O}$ ) was purchased from Tianjin Kemeiou Chemical Reagent Co. LTD. Thiourea ( $\text{CH}_4\text{N}_2\text{S}$ ) was purchased from Shanghai Huzhou Chemical Co. LTD. Terpineol was obtained from Aladdin Chemical Reagent Company. Oleylamine ( $\text{C}_{18}$ :90%) was purchased from Beijing Innochem Science & Technology Co. LTD.

### 2. Preparation of photocatalysts

#### 2.1 Synthesis of the ultrathin $\text{InS}_x\text{O}_y$ nanowires.

Typically, 58.6 mg of indium chloride tetrahydrate and 11.4 mg of thiourea were dissolved in a mixed solution containing 5.0 mL of ethanol and 5.0 mL of terpineol. Then, 2.0 mL of oleylamine was added into above solution resulting a transparent solution after stirring. Finally, the obtained solution was transformed into 25.0 mL Teflon-sealed autoclave and heated at 200 °C for 6 h. The products were collected by physical centrifuging at 8000 rpm, washed with 5.0 mL hexamethylene and 10.0 mL ethanol for several times.

#### 2.2 Synthesis of the ultrathin $\text{InS}_x\text{O}_y$ nanosheets.

58.6 mg of indium chloride tetrahydrate and 38.0 mg of thiourea were dissolved in a mixed solution containing 5.0 mL of ethanol and 5.0 mL of terpineol. Then, 2.0 mL of oleylamine was added into above solution resulting a transparent solution after stirring. Finally, the obtained solution was transformed into 25.0 mL Teflon-sealed autoclave and heated at 200°C for 6 h. The products were collected by physical centrifuging at 8000 rpm, washed with 5.0 mL hexamethylene and 10.0 mL ethanol for several times.

#### 2.3 Synthesis of the $\text{In}_2\text{O}_3$ nanospheres.

58.6 mg of indium chloride tetrahydrate was dissolved in a mixed solution containing 5.0 mL of ethanol and 5.0 mL of terpineol. Then, 2.0 mL of oleylamine was added into above solution resulting a transparent solution after stirring. Finally, the obtained solution was transformed into 25.0 mL Teflon-sealed autoclave and heated at 200 °C for 6 h. The products were collected by physical centrifuging at 8000 rpm, washed with

5.0 mL hexamethylene and 10.0 mL ethanol for several times.

### 3. Materials Characterization

The structures, morphologies, chemical compositions and distribution and the phase composition of the as-prepared products were investigated by TEM, STEM, EDS Mapping, XPS, and XRD techniques. Powder X-ray diffraction (XRD) spectra was recorded by using a Rigaku D/Max 2500 diffractometer with Cu K $\alpha$  radiation in the range of  $2\theta = 10^\circ$ - $80^\circ$ . X-ray photoelectron spectroscopy (XPS) tests were carried out on the PHI5000VersaProbe III instrument, aiming to analyze chemical elements' composition of the preparative samples qualitatively and quantitatively. The microstructure was examined by transmission electron microscopy (TEM) (JEOL-JEM-2010) at an operation voltage of 200 kV. Inductively coupled plasma atomic emission spectroscopy (ICP-AES) was used to analyze the element contents of the products. The ultraviolet photoemission spectroscopy (UPS) was measured by a Thermo Fisher 250Xi instrument with a photon energy of 21.22 eV, the contact potential difference between the samples and the spectrometer was estimated using the formula  $E_{NHE}/V = \Phi + VB_{max} - 4.44$  ( $E_{NHE}$ : potential of normal hydrogen electrode at pH = 0;  $\Phi$ : the electron work function of the spectrometer). The In-situ FT-IR spectra were acquired from a Shimadzu Tracer-100 FTIR spectrometer.

### 4. Photoelectrochemical measurements

The electrochemical measurement of as-prepared sample was performed on an electrochemical workstation (Bio-Logic VSP). The electrochemical impedance spectroscopy (EIS), and photocurrent response were performed by using three-electrode measurement method, that is, the Ag/AgCl electrode was used as reference electrode, the Pt wire conduct as counter electrode, the 0.5 M Na<sub>2</sub>SO<sub>4</sub> served as electrolyte solution, and the catalysts powder coated on the FTO glass substrate was served as working electrode. 5 mg of sample was added in 0.5 mL ultra-pure water, and dispersed the sample to form a homogeneous slurry by ultrasonic method. After 60 min, the homogeneous slurry was dispersed on the FTO glass substrate (1 cm  $\times$  1 cm) and dried at room temperature. The light source is the 300 W Xe lamp (Perfect Light, China).

#### 4.1 Fluorescence Lifetime measurements

Time-resolved fluorescence spectroscopy of as-prepared samples were obtained from the Edinburgh Instruments FLS980 ( $\lambda_{\text{ex}} = 325 \text{ nm}$ ,  $\lambda_{\text{em}} = 450 \text{ nm}$ ) and the decay curves can be well fitted by the following biexponential equations:

$$\tau = \frac{\sum A_n \tau_n^2}{\sum A_n \tau_n} \quad (n=1,2,3,\dots) \quad (1)$$

$$y = y_0 + \sum A_n e^{-x/\tau_n} \quad (n=1,2,3,\dots) \quad (2)$$

where the  $y_0$  represents the baseline correction value,  $A_n$  ( $n=1,2,3,\dots$ ) are the pre-exponential factors, and  $\tau_n$  ( $n=1,2,3,\dots$ ) and  $\tau$  represent the lifetime (ns) in different processes and average lifetime.

#### 4.2 Photocatalytic CO<sub>2</sub> reduction

The CO<sub>2</sub> photoreduction activity evaluation of as-prepared samples was conducted by a 120 mL PLR MFPR-I closed gas system (Perfect Light, China). The light source is the 300 W Xe lamp (Perfect Light, China). Typically, 4 mg of sample, 5 mg of CoCl<sub>2</sub>, 15 mg of 2,2'-bipyridine (bpy), 1 mL of triethanolamine (TEOA), 2 mL of H<sub>2</sub>O and 3 mL of acetonitrile (MeCN) were added into a 120 mL PLR MFPR-I closed gas system. Subsequently, the reaction vessel was vacuum-treated and pumped by high-purity CO<sub>2</sub> (99.99%) for five times, then make the CO<sub>2</sub> to reach an atmospheric pressure. A 300 W Xe lamp light source directly irradiated the photocatalysts through the quartz window of reaction vessel. The products were determined by online analysis method using gas chromatography (GC2002, Ke Chuang Corp., China), equipping with a flame ionization detector (FID).

The cobalt phthalocyanine (CoPc) as cocatalyst for CO<sub>2</sub> photoreduction is according to the reported literature method. Typically, 4 mg as-prepared sample, 3 mg CoPc, 3 mL ultra-pure water, 1 mL TEOA, and 1 mL acetonitrile were added into the reaction vessel. Subsequently, the reaction vessel was vacuum-treated and pumped by high-purity CO<sub>2</sub> (99.99%) for five times, then make the CO<sub>2</sub> to reach an atmospheric pressure. A 300 W Xe lamp light source directly irradiated the photocatalysts through the quartz window of reaction vessel. The next steps are the same as the above

$\text{Co}(\text{bpy})_3^{2+}$  as  $\text{CO}_2$  reduction cocatalysts.

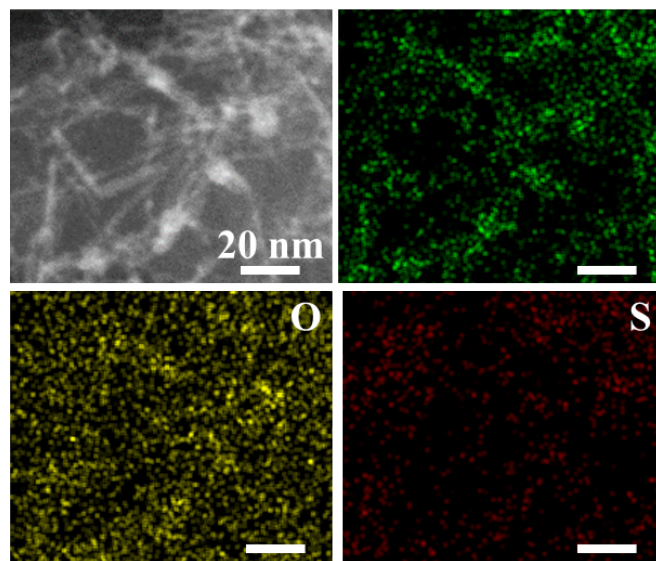

**Figure S1.** EDS mapping images of S, O, and In elements.

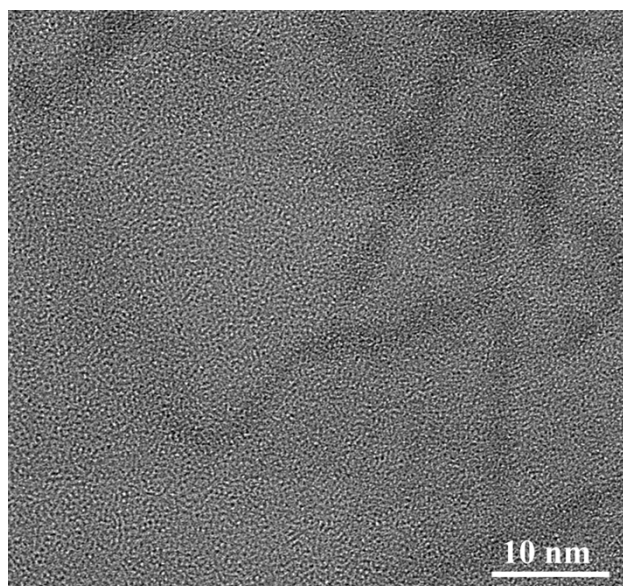

**Figure S2.** HRTEM image of  $\text{InS}_x\text{O}_y$  NWs.

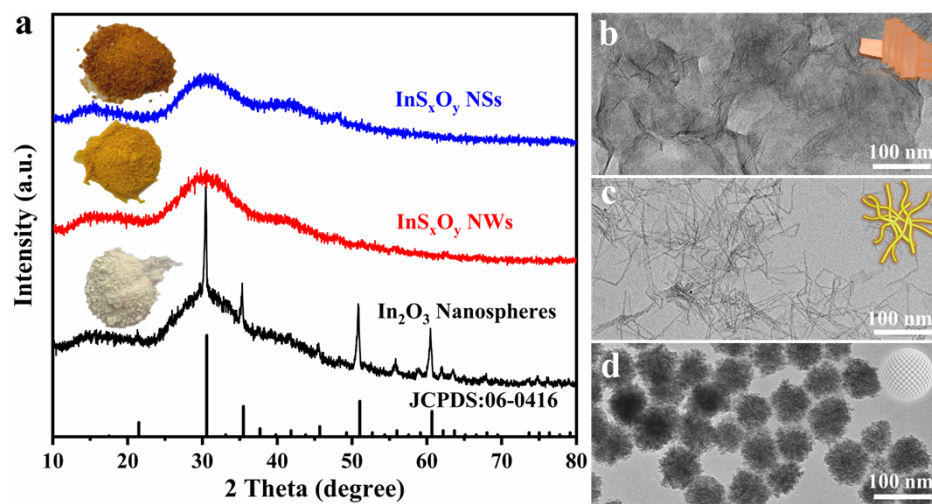

**Figure S3.** (a) The XRD patterns of  $\text{In}_2\text{O}_3$  nanospheres,  $\text{InS}_x\text{O}_y$  NWs and  $\text{InS}_x\text{O}_y$  NSs. (b-d) TEM images of  $\text{InS}_x\text{O}_y$  NSs,  $\text{InS}_x\text{O}_y$  NWs and  $\text{In}_2\text{O}_3$  nanospheres.

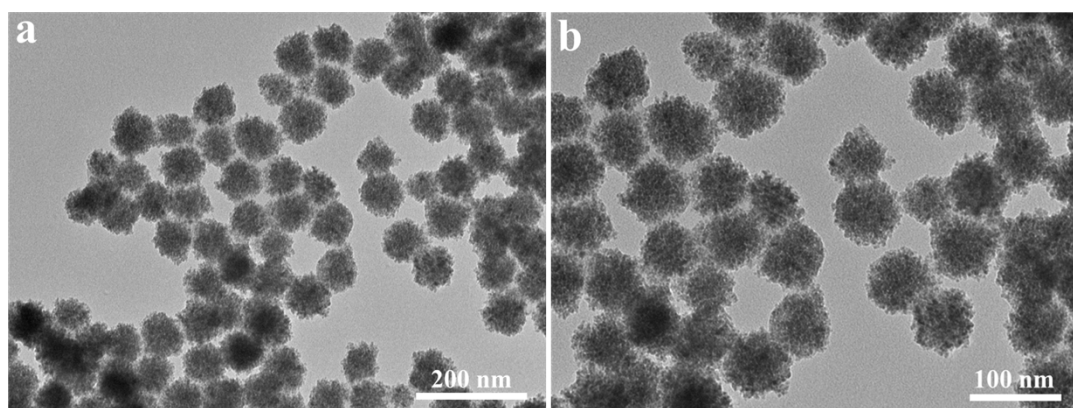

**Figure S4.** (a-b) TEM images of pure  $\text{In}_2\text{O}_3$  nanospheres.

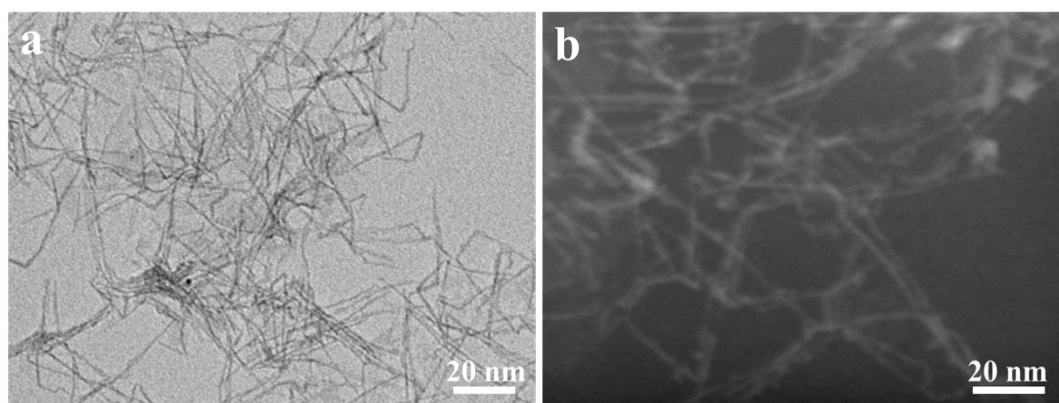

**Figure S5.** (a) TEM image of  $\text{InS}_x\text{O}_y$  NWs, (b) HAADF-STEM image of  $\text{InS}_x\text{O}_y$  NWs.

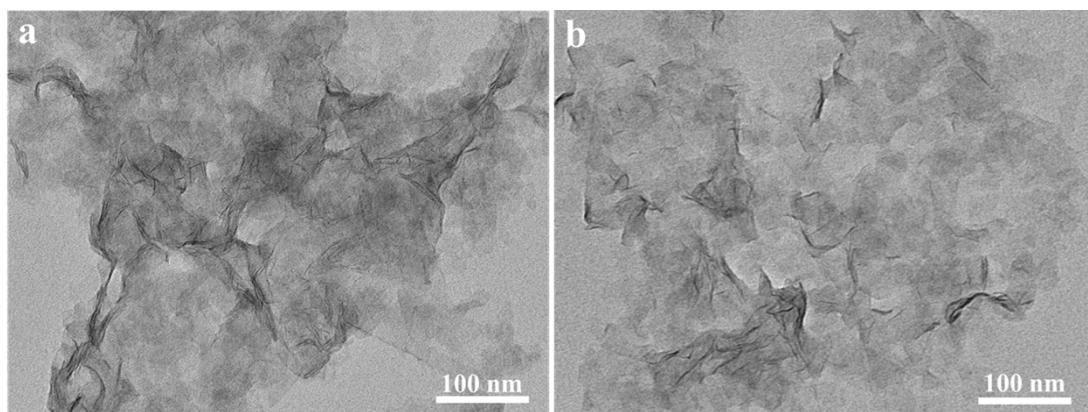

**Figure S6.** (a-b) TEM images of  $\text{InS}_x\text{O}_y$  NSs.

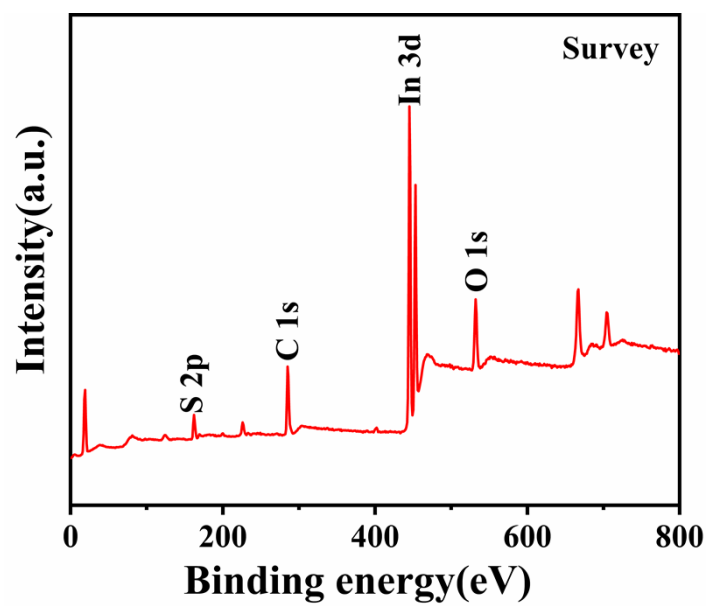

**Figure S7.** XPS survey spectrum of the  $\text{InS}_x\text{O}_y$  NWs.

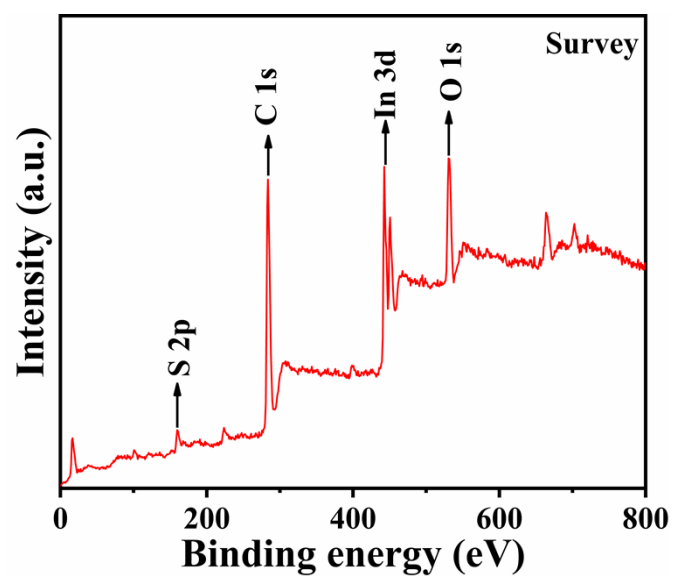

**Figure S8.** XPS survey spectrum of the  $\text{InS}_x\text{O}_y$  NSs.

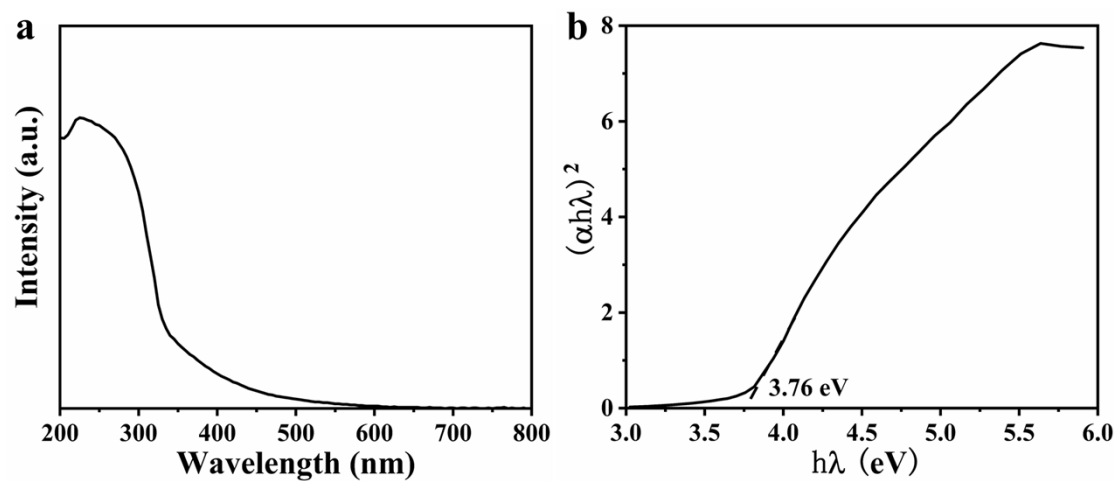

**Figure S9.** (a) UV-vis diffuse reflectance spectra and (b) plots of the transformed Kubelka-Munk function versus the light energy.

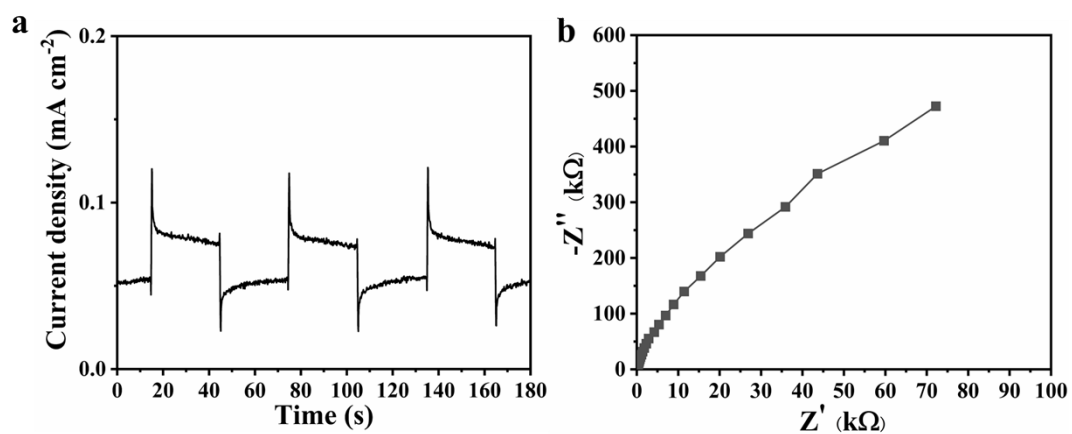

**Figure S10.** (a) Photocurrent response curves of In<sub>2</sub>O<sub>3</sub> nanospheres, and (b) Electrochemical impedance spectrum.

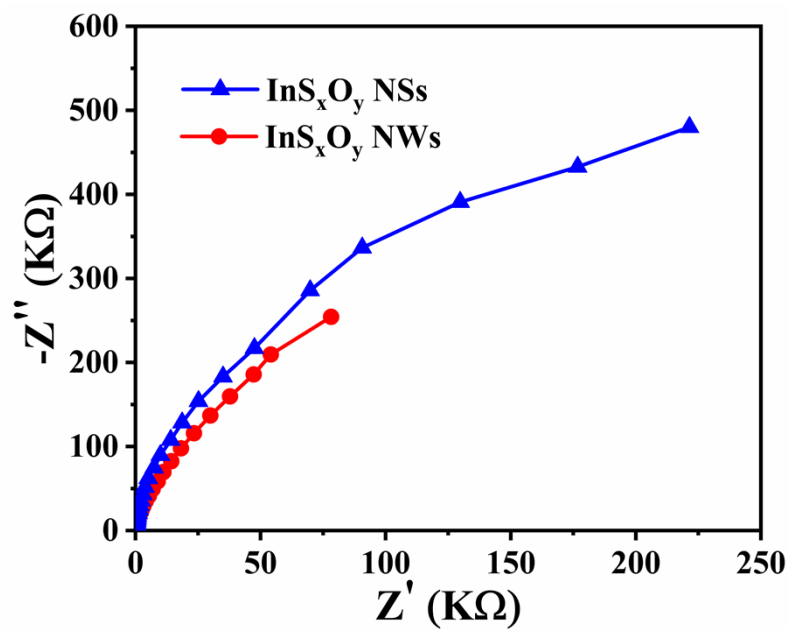

**Figure S11.** Electrochemical impedance spectra of InS<sub>x</sub>O<sub>y</sub> NSs and InS<sub>x</sub>O<sub>y</sub> NWs.

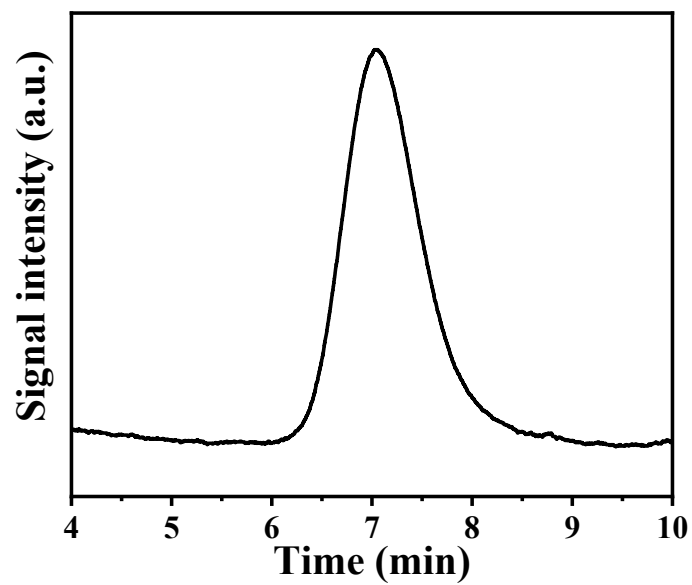

**Figure S12.** The CO peak of FID signal for  $\text{InS}_x\text{O}_y$  NWs photocatalytic  $\text{CO}_2$  reduction system after 6 hours.

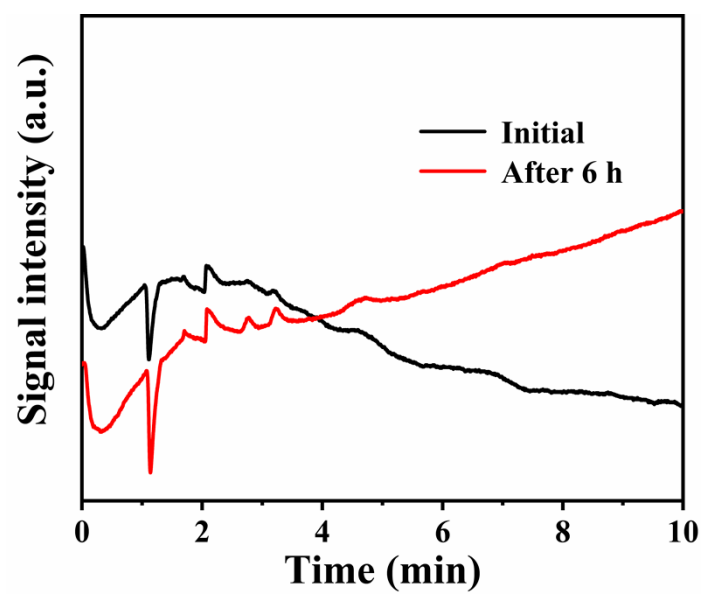

**Figure S13.** Gas chromatography spectra of photocatalytic CO<sub>2</sub> reduction without adding the photocatalysts.

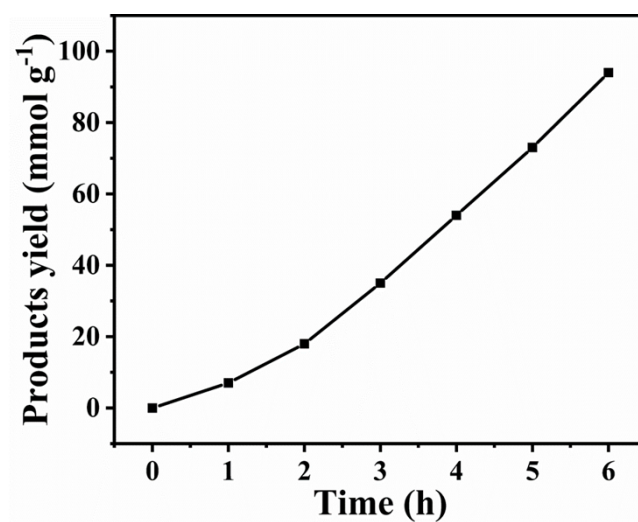

**Figure S14.** Photocatalytic CO<sub>2</sub> reduction performance of pure In<sub>2</sub>O<sub>3</sub> nanospheres with the cocatalyst of Co(bpy)<sub>3</sub><sup>2+</sup>.

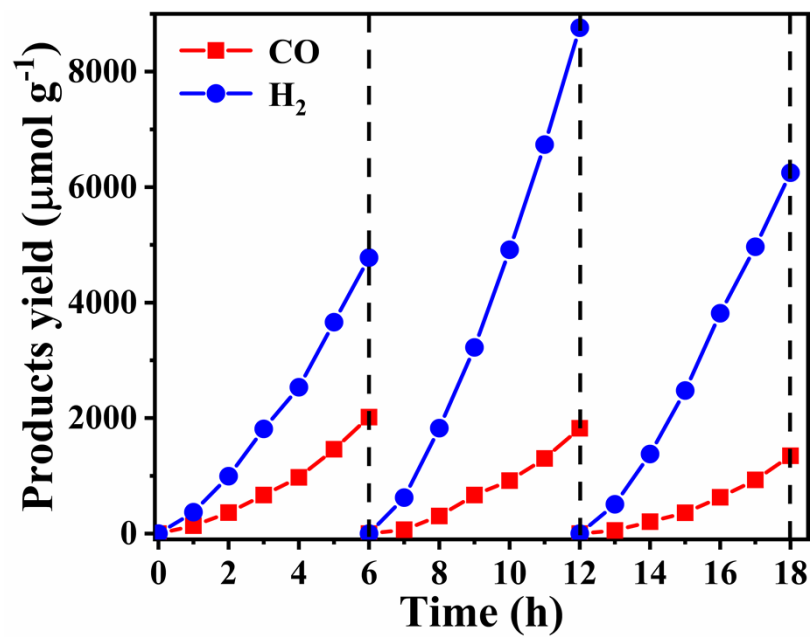

**Figure S15.** Cycling stability of InS<sub>x</sub>O<sub>y</sub> NWs.

**Table S1.** Band gap and energy band position of InS<sub>x</sub>O<sub>y</sub> NWs and InS<sub>x</sub>O<sub>y</sub> NSs.

| Samples                             | Band gap (eV) | Valence band (eV) | Conduction band (eV) |
|-------------------------------------|---------------|-------------------|----------------------|
| InS <sub>x</sub> O <sub>y</sub> NWs | 2.36          | 1.10              | -1.26                |
| InS <sub>x</sub> O <sub>y</sub> NSs | 2.25          | 0.36              | -1.89                |

**Table S2.** The fluorescence lifetime, time-resolved luminescence spectrum and polarization spectrum of the InS<sub>x</sub>O<sub>y</sub> NWs and InS<sub>x</sub>O<sub>y</sub> NSs.

| Samples                             | A <sub>1</sub> | τ <sub>1</sub> /ns | A <sub>2</sub> | τ <sub>2</sub> /ns | τ/ns |
|-------------------------------------|----------------|--------------------|----------------|--------------------|------|
| InS <sub>x</sub> O <sub>y</sub> NWs | 2896.10        | 7.37               | 1.64           | 80.67              | 7.82 |
| InS <sub>x</sub> O <sub>y</sub> NSs | 3187.10        | 7.046              | 1.76           | 70.46              | 7.39 |

**Table S3.** Comparison of the photocatalytic activity with other photocatalysts.

| Photocatalyst                                                                        | Synthesis methods          | CO/H <sub>2</sub> production rates ( $\mu\text{mol g}^{-1} \text{h}^{-1}$ ) | Ref.                                            |
|--------------------------------------------------------------------------------------|----------------------------|-----------------------------------------------------------------------------|-------------------------------------------------|
| <b>InS<sub>x</sub>O<sub>y</sub> NWs</b>                                              | <b>Solvothermal method</b> | <b>336/812</b>                                                              | <b>This work</b>                                |
| Pt/BP-OvMBWO Heterostructure                                                         | Hydrothermal method        | 20.5/16.8                                                                   | ACS Appl. Mater. Inter. 2021, 13, 20162-20173.  |
| MnO <sub>x</sub> @TiO <sub>2</sub> @CuP<br>t                                         | A hard-templating method   | 84.2/168.4                                                                  | Chem. Sci. 2018, 9, 5334-5340.                  |
| Ni-SA-5/ZrO <sub>2</sub>                                                             | Solvothermal method        | 11.8 (CO)                                                                   | Adv. Energy Mater. 2020, 10, 2002928.           |
| Br-Bi <sub>2</sub> WO <sub>6</sub>                                                   | Hydrothermal approach      | 13.8 (CO)                                                                   | ChemSusChem, 2020, 13, 5638-5646.               |
| Co(OH) <sub>2</sub> /H <sub>2</sub> Ti <sub>6</sub> O <sub>13</sub> hybrid composite | Hydrothermal method        | 56.5/59.3                                                                   | ACS Appl. Mater. Inter. 2021, 13, 38239-38247.  |
| Co-Bi <sub>3</sub> O <sub>4</sub> Br                                                 | Hydrothermal method        | 107.1 (CO)                                                                  | Nat. Commun. 2019, 10, 2840.                    |
| Atomically-thin Bi <sub>2</sub> WO <sub>6</sub>                                      | Solvothermal method        | 75 (CO)                                                                     | Angew. Chem. Inter. Ed., 2015, 54, 13971-13974. |
| ZnIn <sub>2</sub> S <sub>4</sub>                                                     | Solvothermal method        | 33.2 (CO)                                                                   | J. Am. Chem. Soc., 2017, 139, 7586-7594.        |
| CdSe QDs/ZnSe hybrid                                                                 | Solvothermal method        | 25.6 (CO)                                                                   | Chinese Chem. Lett. 2021, 32, 2474-2478         |
| TiO <sub>2</sub> -INA@CuP-Ph COF hybrid material                                     | Solvothermal method        | 50.5 (CO)                                                                   | J. Energy Chem. 2022, 64, 85-92.                |
